# Supplementary material for: A novel USP9X substrate TTK contributes to tumorigenesis in non-small-cell lung cancer
Source: PubMed Central journal article supplement — Theranostics. 2018 Mar 22;8(9):2348–60. doi: 10.7150/thno.22901 (PMC5928894; doi:10.7150/thno.22901), 2018-03-22
Supplement: thnov08p2348s1.pdf [file thnov08p2348s1.pdf]

## Supplementary Materials

### Supplementary Figure Legends

**Figure S1. (A)** Venn diagram showed the overlapped identified proteins between our A549 cells dataset and the published USP9x knock-down proteome in MCF-7 cells by Wang *et al.* **(B)** Venn diagram showed the overlapped down-regulated proteins between our A549 cells dataset and the published USP9x knock-down proteome in MCF-7 cells by Wang *et al.* using the same criterion represented by Wang *et al.* (protein ratio of  $[\leq 0.770, \geq 1.3]$ , and  $P$  value  $< 0.05$ ).

**Figure S2. (A-C)** NCI-H1975, NCI-H125 and NCI-H3122 cells were transfected with either two different siRNAs targeting USP9X or a control siRNA respectively. After 48 hours, cells were harvested and proteins were analyzed by immunoblotting. **(D)** Multiple kinds of lung cancer cells were harvested for immunoblotting, the correlated pattern of the protein expression levels of USP9X and TTK in these cell lines was shown. **(E)** Flag-TTK, ubiquitin K63-only plasmids, siRNA or siUSP9X were co-transfected into 293T cells. The indicated cells were treated with MG132 overnight. Then cells were extracted for immunoprecipitation with anti-flag agarose, furthermore, analyzed by western blotting. **(F)** A549 cells were transfected with either control or USP9X siRNA. After 48 hours, DMSO (D) or proteasome inhibitor Bortezomib (B) was added as indicated and cells were harvested for immunoblotting.

**Figure S3. (A)** A549 cells were transfected with either three different siRNAs targeting TTK or a control siRNA. After 48 hours, cells were harvested and proteins analyzed by immunoblotting. **(B)** Stable knockdown of either USP9X or TTK decreased HeLa cells migration ability which was measured by wound-healing assay. The wound edges are indicated by black lines. Representative images are shown. The quantitative results (left) and WB result (right) are shown at the bottom. The y axis represents percentage of wound closure. Data are represented as mean  $\pm$  s.d. ( $n = 3$ , \*\*\*  $P < 0.001$ , t-test). **(C)** A549 cells were treated with WP1130 as the indicated drug concentration for 8 hours. Then protein samples were harvested for immunoblotting. **(D)** A549 cells were treated with WP1130 as the indicated time points at 10  $\mu$ M. Then protein samples were harvested for immunoblotting.

**Figure S4. (A)** A549 cells stably transfected with shRNAs targeting USP9X or shGFP were harvested for immunoblotting. **(B)** A549 cells stably transfected with shRNAs targeting TTK or shGFP were harvested for immunoblotting. **(C)** A549 cells stably expressing shGFP was

transiently overexpressed empty vector control (EV), shUSP9X were transiently overexpressed EV or TTK respectively. After 48 hours, cells were harvested and proteins were analyzed by immunoblotting. **(D)** TTK transient overexpression significantly increased cell proliferation in USP9X stable knockdown A549 cells. Each bar represents the mean  $\pm$  s.d. (n = 4, \*\*\* P < 0.001, two-way ANOVA)

Supplementary Figures

Figure S1

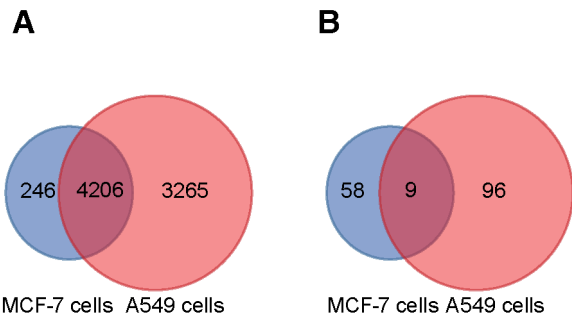

Figure S2

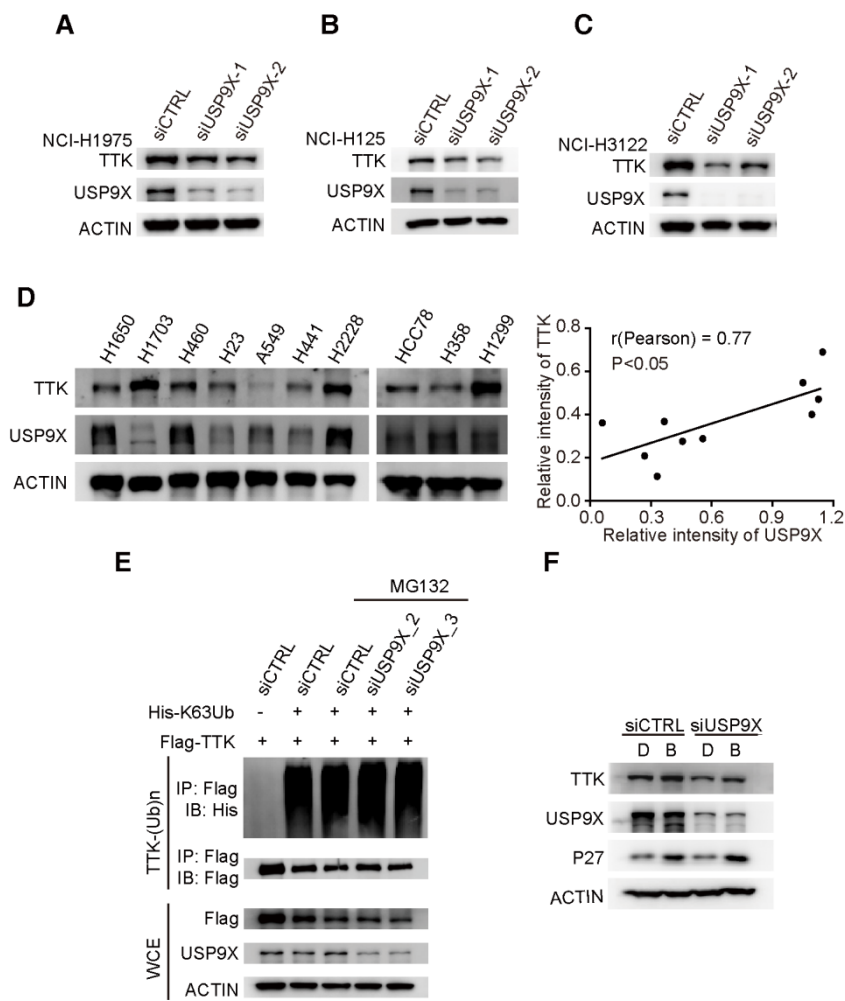

Figure S3

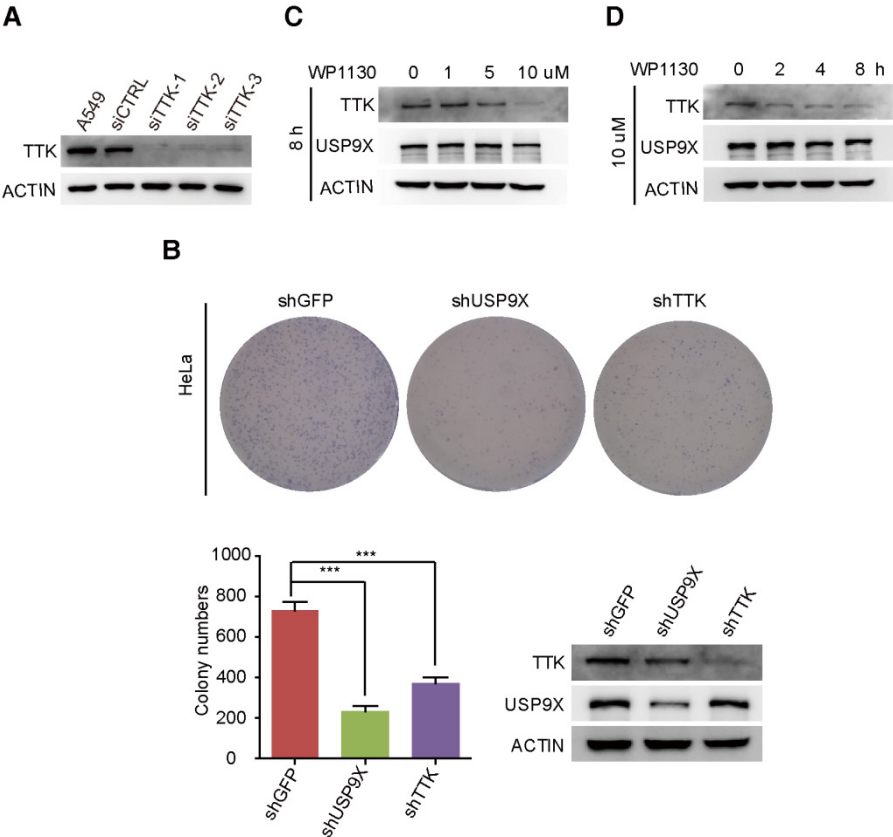

Figure S4

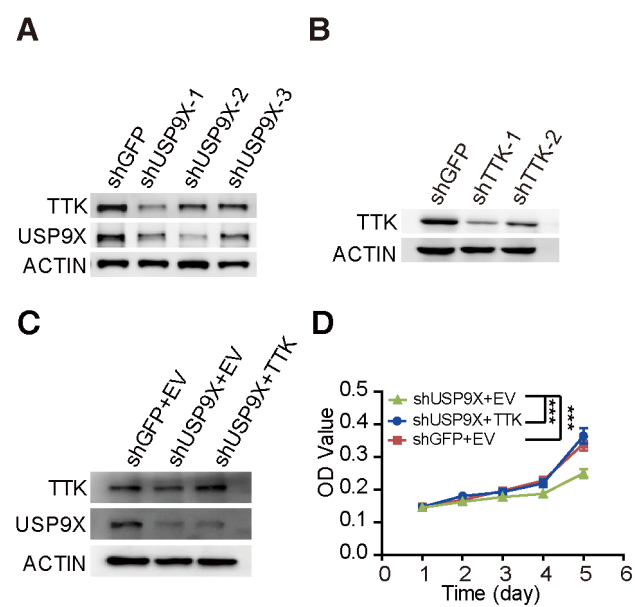

## Supplementary Table

**Table S1**

The list of 22 down-regulated proteins in USP9X-knockdown cells

| Gene names | Ratio(KD/Con) | T-test p-value |
|------------|---------------|----------------|
| UBXN8      | 0.648         | 2.198E-02      |
| PIBF1      | 0.658         | 1.505E-02      |
| MYO15B     | 0.643         | 4.493E-02      |
| NCOA4      | 0.493         | 3.863E-02      |
| TAX1BP1    | 0.607         | 1.971E-02      |
| FOPNL      | 0.628         | 3.434E-02      |
| CPEB2      | 0.452         | 2.008E-02      |
| MPRIP      | 0.610         | 4.695E-03      |
| SYNM       | 0.585         | 2.702E-02      |
| HSP90AA1   | 0.665         | 3.265E-02      |
| TTK        | 0.624         | 2.149E-02      |
| MLLT11     | 0.482         | 5.967E-04      |
| MLK4       | 0.461         | 3.425E-03      |
| CPLX2      | 0.434         | 1.724E-02      |
| KIAA0907   | 0.384         | 4.868E-02      |
| USP9X      | 0.563         | 4.891E-03      |
| ITFG2      | 0.625         | 6.232E-03      |
| FAM49B     | 0.666         | 1.747E-04      |
| RNF19A     | 0.596         | 4.226E-02      |
| HECTD1     | 0.665         | 1.188E-02      |
| RNF115     | 0.516         | 3.371E-02      |
| FAM73A     | 0.635         | 1.839E-02      |
